# Supplementary material for: Synthesis of copper submicro/nanoplates with high stability and their recyclable superior catalytic activity towards 4-nitrophenol reduction
Source: Royal Society of Chemistry journal article supplement (doi:10.1039/c3ta12526b), 2013-01-01
Supplement: c3ta12526b.pdf [file c3ta12526b.pdf]

## Supporting Information

### Scalable synthesis of copper submicron/nanoplates with high stability and their recyclable superior catalytic activity towards 4-nitrophenol reduction

Yang Sun   Li Xu   Zhilei Yin   Xinyu Song\*

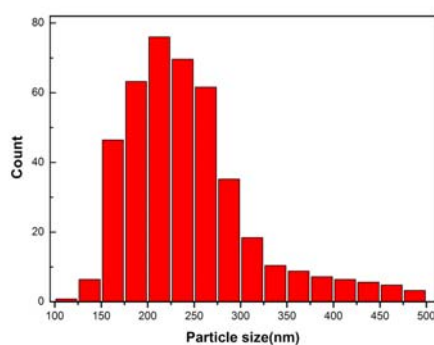

**Fig.S1** The size distribution of copper submicroplates as-prepared (pH=4.5) in a typical synthesis

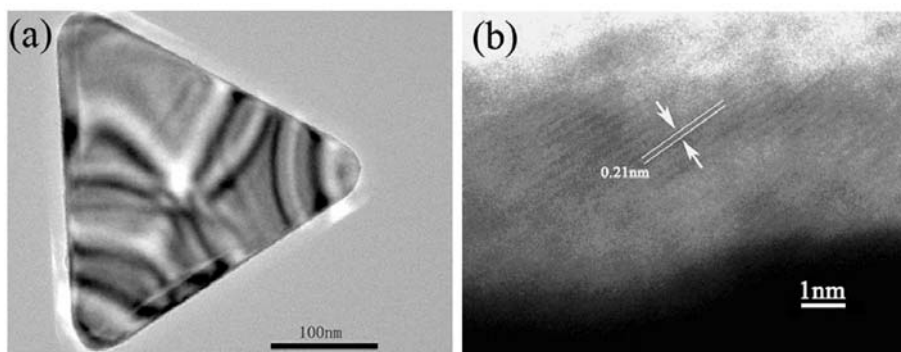

**Fig.S2** (a-b) HR-TEM images of a triangular copper submicroplate.

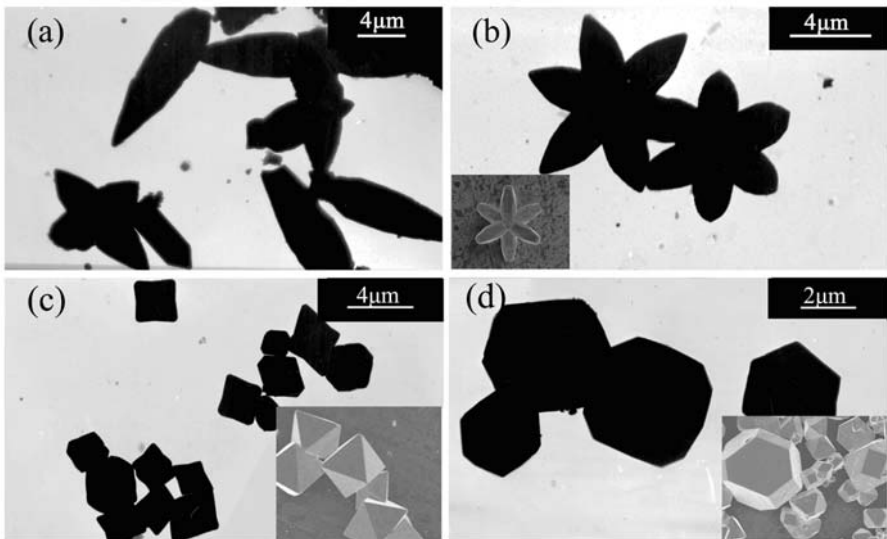

**Fig.S3** TEM images of Cu<sub>2</sub>O sampled at different pH of the initial reaction solution:  
 (a) pH~7.0, (b) pH~8.0, (c) pH~9.0,(d) pH~10.0.

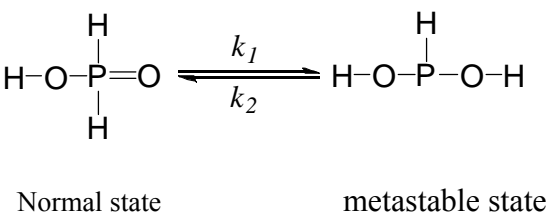

**Fig.S4** The structure changes of NaH<sub>2</sub>PO<sub>2</sub> with variation of the pH in aqueous solution

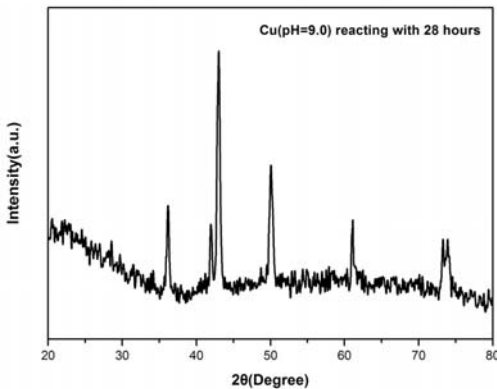

**Fig.S5** XRD pattern of the obtained copper nanoplates at pH~9.0 reacting with 28hours

## Section1:

The secondary reaction can be expressed by:

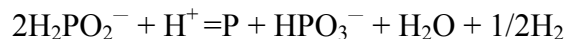

With the large amount  $\text{H}^+$  ions in solution and the continuous generated  $\text{H}^+$  ions from the  $\text{H}_2\text{PO}_2^-$ , part of sodium hypophosphate would react with  $\text{H}^+$  and finally convert into  $\text{HPO}_3^-$  and P. Therefore  $\text{NaH}_2\text{PO}_2$  as reductant in the solution (pH=4.0) can't reduce copper ion completely and the products obtained were the compound of Cu and  $\text{Cu}_2\text{O}$ . If the amount of  $\text{NaH}_2\text{PO}_2$  was increased twice at pH~4.0, the copper product was obtained that proved in Fig.S6.

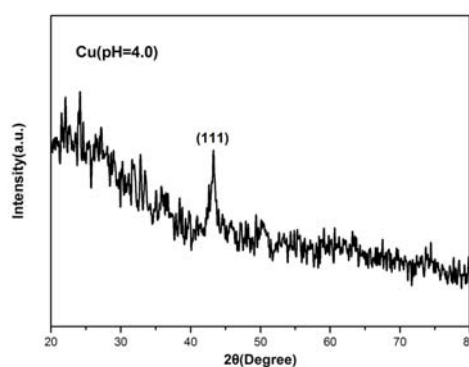

**Fig. S6** XRD pattern of the obtained copper nanoplates at pH~4.0, adding twice amount of  $\text{NaH}_2\text{PO}_2$  to solution

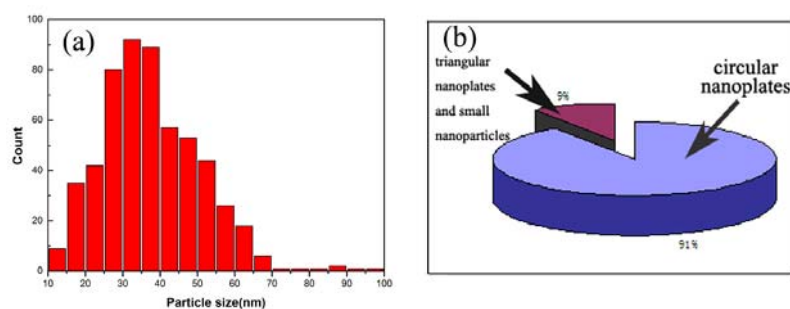

**Fig. S7** (a) The size distribution of copper nanoplates as-prepared with 0.35g  $\text{KNaC}_4\text{H}_4\text{O}_6$   
(b) Percentage of circular and triangular nanoplates & small nanoparticles

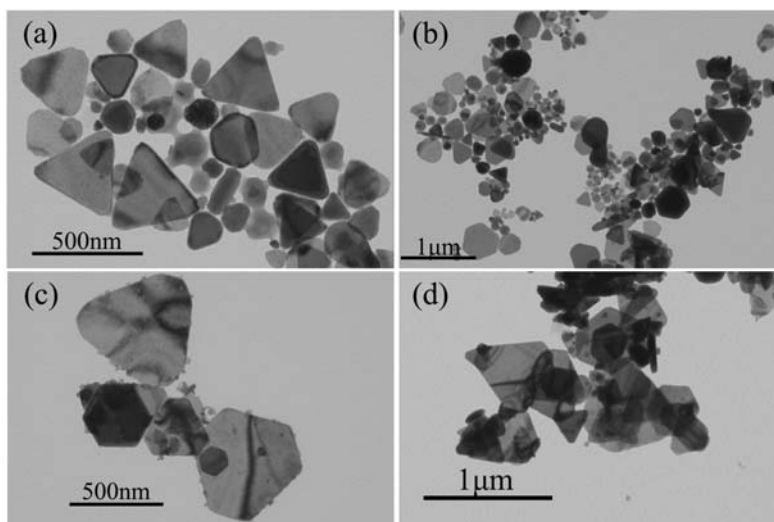

**Fig. S8** TEM images of the Cu plates synthesized with different concentration of sodium potassium tartrate: (a) ~ (b) 1.75 g, (c) ~ (d) 2.10 g

## Section 2:

The interaction energies ( $U$ ) were calculated, expressed by:

$$U = E_{\text{total}} - (E_{\text{surface}} + E_{\text{polymer}})$$

where  $E_{\text{total}}$  is the total energy of the Cu-surfactant system,  $E_{\text{surface}}$  is the surface energy without the surfactant,  $E_{\text{polymer}}$  is the energy of PVP molecules.

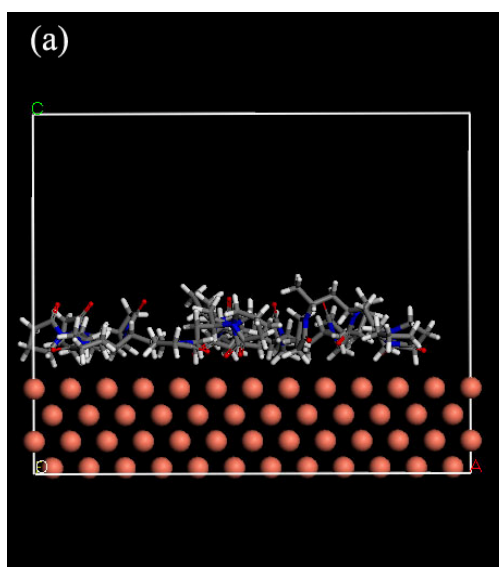

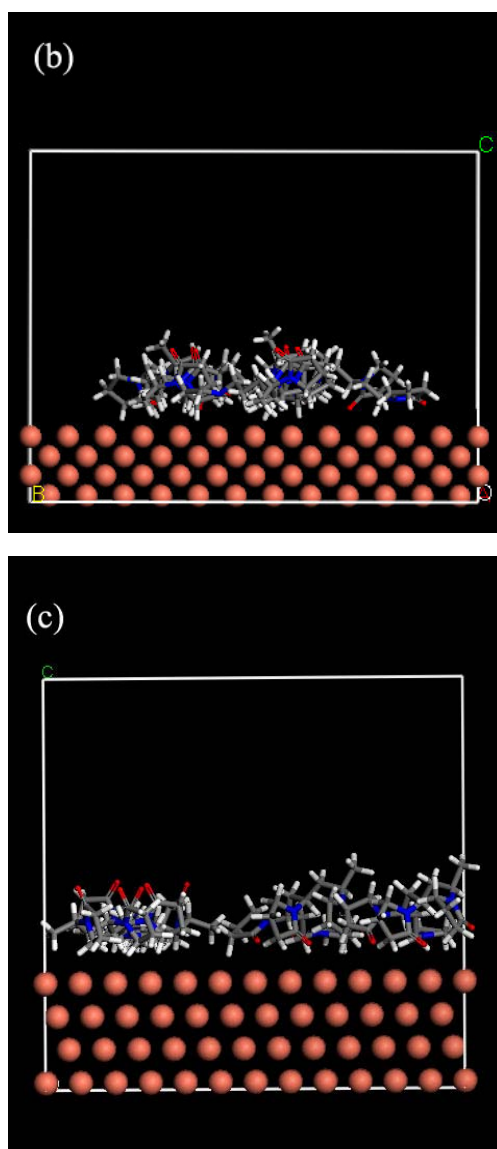

**Fig. S9** The MD simulation shows PVP adsorbed on each of the copper surfaces  
(a) (100), (b) (110) and (c) (111)

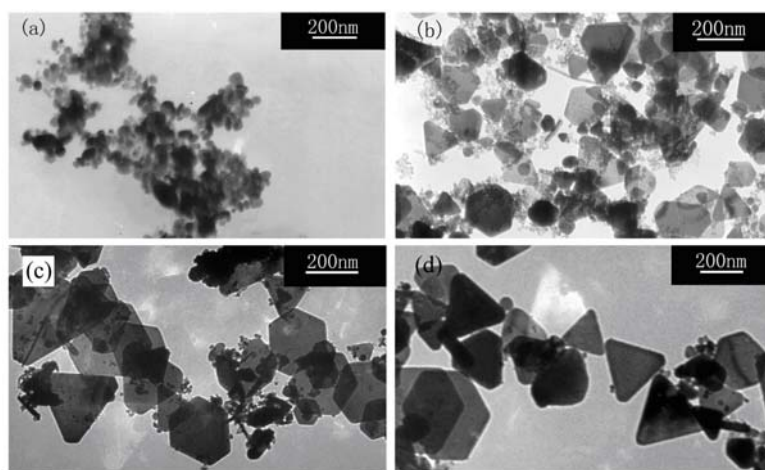

**Fig.S10** TEM images of the synthesized copper submicroscale products at different stages: (a) 2h, (b) 4h, (c) 6h and (d) 8h

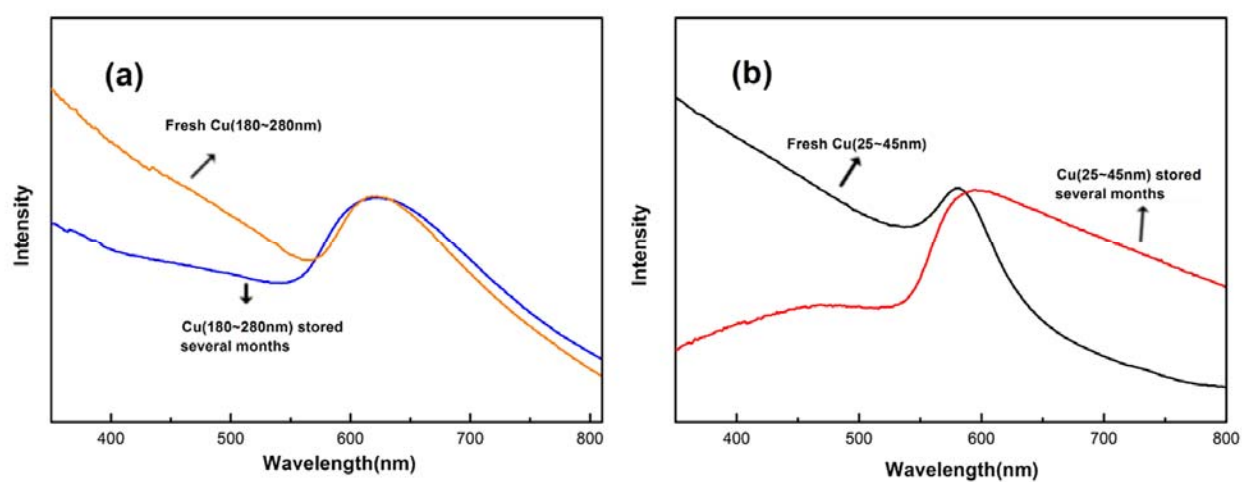

**Fig.S11** Successive UV-Vis spectra of the different copper samples: (a) fresh Cu-1, Cu-1 after stored several months (b) fresh Cu-1, Cu-2 after stored several months

**Table S1** Results of the reduction rate of 4-NP at room temperature catalyzed by the  
different catalysts

| Catalyst                                                                    | k (min <sup>-1</sup> ) |
|-----------------------------------------------------------------------------|------------------------|
| Cu-1 (obtained with 1.05g KNaC <sub>4</sub> H <sub>4</sub> O <sub>6</sub> ) | 0.340                  |
| Cu-2 (obtained with 0.35g KNaC <sub>4</sub> H <sub>4</sub> O <sub>6</sub> ) | 0.373                  |
| Cu-3 (obtained with Na-citrate)                                             | 0.202                  |
| Cu-4 (commercial Cu powder)                                                 | 0.016                  |

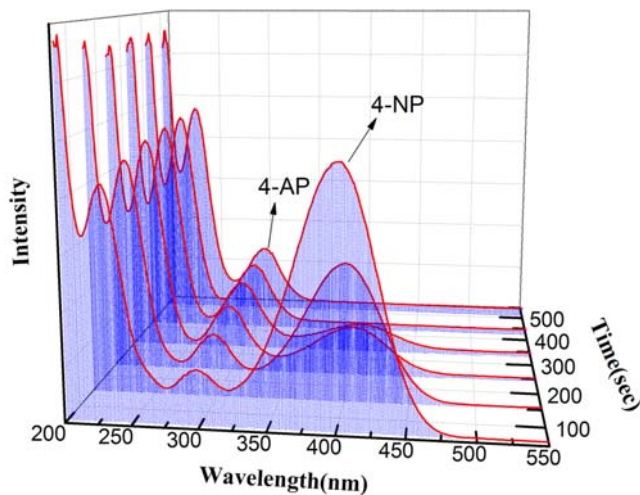

**Fig. S12** Successive UV-Vis spectra of solutions of 4-NP sampled converted into 4-AP at different time with catalyst Cu-1.

Conditions: [4-NP] =  $5.0 \times 10^{-4}$  M; Cu = 0.07mg; [NaBH<sub>4</sub>] =  $3.0 \times 10^{-2}$  M;  
with T = 25°C

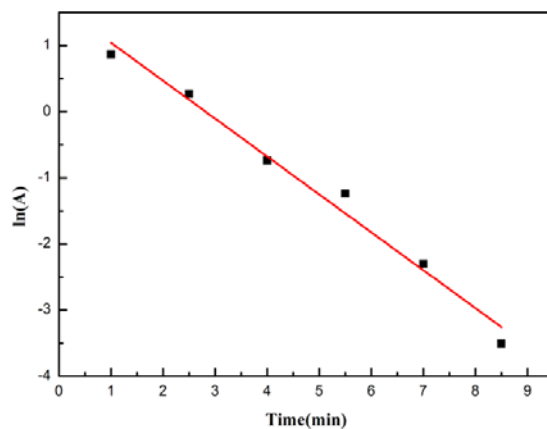

**Fig. S13** Absorbance  $\ln(A)$  vs. time plot for the reduction of 4-NP with Cu-1

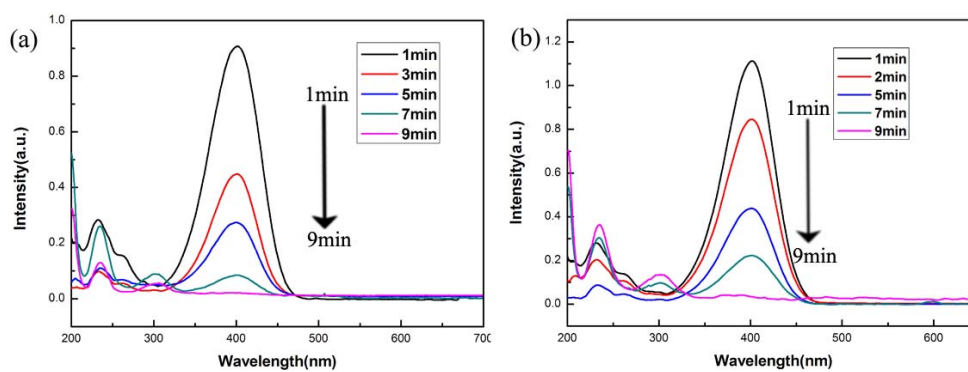

**Fig. S14** Successive UV-Vis spectra of the reduction reaction after several months  
(a) the copper catalyst in size 180~280 nm, (b) the copper nanocatalyst within 25~45 nm



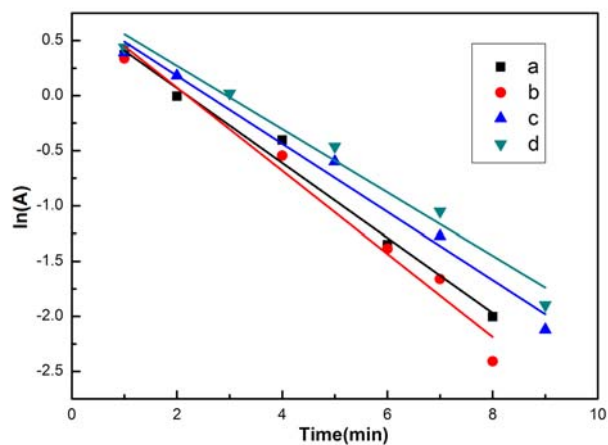

**Fig. S15** Absorbance  $\ln(A)$  vs. time plot for the reduction of 4-NP in the presence of solid catalyst: (a) the fresh Cu-1, (b) the fresh Cu-2, (c) the Cu-1 storing for 2 months, (d) Cu-2 storing for 2 months,

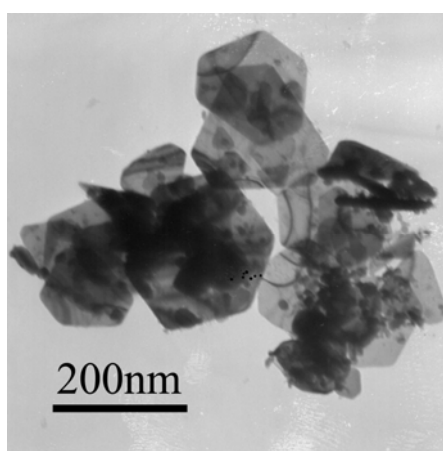

**Fig. S16** TEM image of the used Cu as catalyst
